# Supplementary material
Source: PubMed Central journal article supplement (PMC4038910)
Supplement: NIHMS575356-supplement-Table_S2.pdf [file NIHMS575356-supplement-Table_S2.pdf]

**Table S2. Peptides and MRM transitions Used for the Quantification of ApoE4 isoform and total ApoE.**

| Protein/Peptides           | MRM transitions ( <i>m/z</i> ) |                      |                      |                      |
|----------------------------|--------------------------------|----------------------|----------------------|----------------------|
|                            | Q1 (charge)                    | Q3 (type, charge)    |                      |                      |
| apoE4 (Met)                |                                |                      |                      |                      |
| LGADMEDVR                  | 503.24 (+2)                    | 892.38 ( $y^8, +1$ ) | 835.36 ( $y^7, +1$ ) | 649.30 ( $y^5, +1$ ) |
| <sup>15</sup> N- LGADMEDVR | 509.22 (+2)                    | 903.35 ( $y^8, +1$ ) | 845.33 ( $y^7, +1$ ) | 657.27 ( $y^5, +1$ ) |
| apoE4 (Met-sulfoxide)      |                                |                      |                      |                      |
| LGADMEDVR                  | 511.24 (+2)                    | 908.38 ( $y^8, +1$ ) | 851.36 ( $y^7, +1$ ) | 665.30 ( $y^5, +1$ ) |
| <sup>15</sup> N- LGADMEDVR | 517.22 (+2)                    | 919.35 ( $y^8, +1$ ) | 861.33 ( $y^7, +1$ ) | 673.27 ( $y^5, +1$ ) |
| apoE4 (Met-sulfone)        |                                |                      |                      |                      |
| LGADMEDVR                  | 519.24 (+2)                    | 924.38 ( $y^8, +1$ ) | 867.36 ( $y^7, +1$ ) | 681.30 ( $y^5, +1$ ) |
| <sup>15</sup> N- LGADMEDVR | 525.22 (+2)                    | 935.35 ( $y^8, +1$ ) | 877.33 ( $y^7, +1$ ) | 689.27 ( $y^5, +1$ ) |
| apoE                       |                                |                      |                      |                      |
| ELQAAQAR                   | 443.74 (+2)                    | 644.35 ( $y^6, +1$ ) | 516.29 ( $y^5, +1$ ) | 445.25 ( $y^4, +1$ ) |
| <sup>15</sup> N-ELQAAQAR   | 450.22 (+2)                    | 655.32 ( $y^6, +1$ ) | 525.26 ( $y^5, +1$ ) | 453.23 ( $y^4, +1$ ) |
